# Supplementary material
Source: PubMed Central journal article supplement (PMC2820979)
Supplement: supp_76_4_1125__1.pdf [file supp_76_4_1125__1.pdf]

Table S1: Assignment of terminal restriction fragments observed in TRFLP patterns of *narG* and *nosZ*

|                       |                   | <i>narG</i>   |       |             | <i>nosZ</i>  |          |              |          |                   |          |                    |
|-----------------------|-------------------|---------------|-------|-------------|--------------|----------|--------------|----------|-------------------|----------|--------------------|
|                       |                   | <i>HaeIII</i> |       | <i>XhoI</i> | <i>BtgII</i> |          | <i>NlaIV</i> |          | <i>PvuII+SacI</i> |          |                    |
| TRF (bp) <sup>a</sup> | OTU               | TRF (bp)      | OTU   | TRF (bp)    | OTU          | TRF (bp) | OTU          | TRF (bp) | OTU               | TRF (bp) | OTU                |
| 57                    | 3,4,5,6,7,11      | 56            | 1,3,9 | 268         | 3            | 548      | 1            | 212      | 1,2,5,11,12       | 310      | n.i.               |
| 70                    | n.i. <sup>b</sup> | 72            | 3,13  | 700         | 1,2,4,6-14   | 564      | 1,8,10,11    | 514      | 1                 | 578      | 1,11               |
| 80                    | 5                 | 159           | 4     | -           | -            | 596      | 11           | 700      | 1,3,10,16         | 646      | 7,11,18            |
| 111                   | 2,3,14            | 169           | 1,4   | -           | -            | 614      | 1            | -        | -                 | 700      | 1,8,10,11,13-16,18 |
| 128                   | 1,3,4             | 292           | 5     | -           | -            | 700      | 6,11,18      | -        | -                 | -        | -                  |
| 171                   | 3                 | -             | -     | -           | -            | -        | -            | -        | -                 | -        | -                  |

<sup>a</sup> Length of observed terminal restriction fragment in basepairs.

<sup>b</sup> TRF could not be identified.
